# Supplementary material
Source: publisher figshare collection journal article supplement (https://gsajournals.figshare.com/ndownloader/files/26692376)

Figure S6

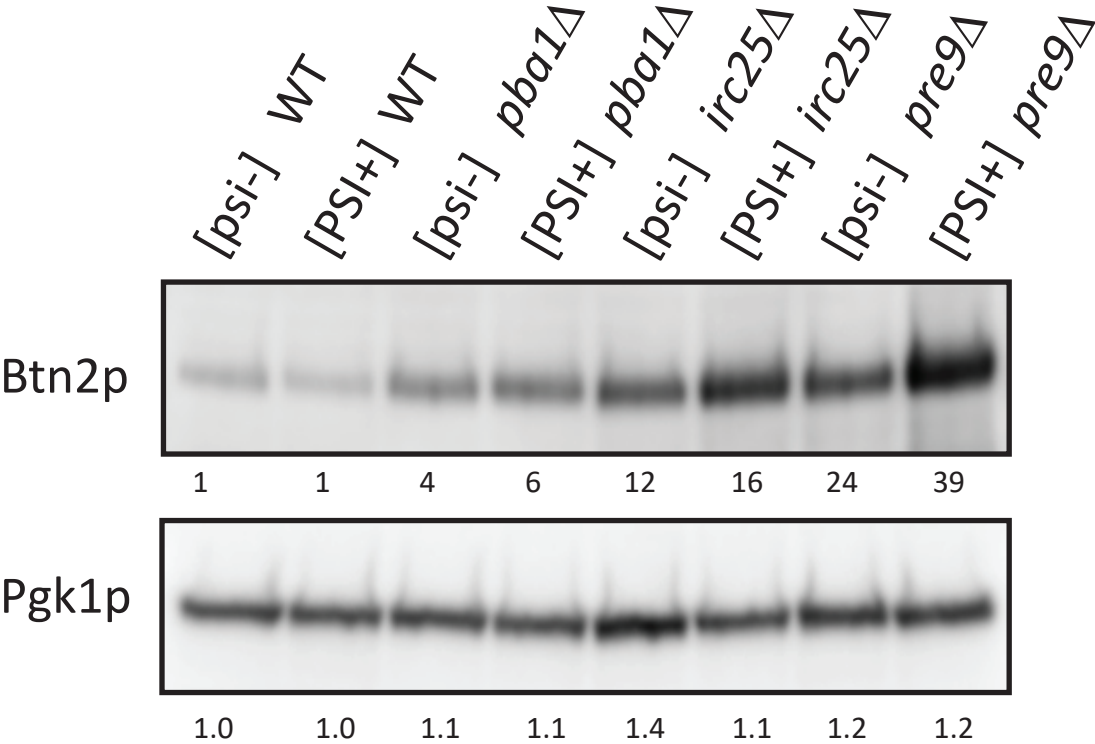

Supplement: Supplementary file 1 [file 26692376]

**Figure S7**

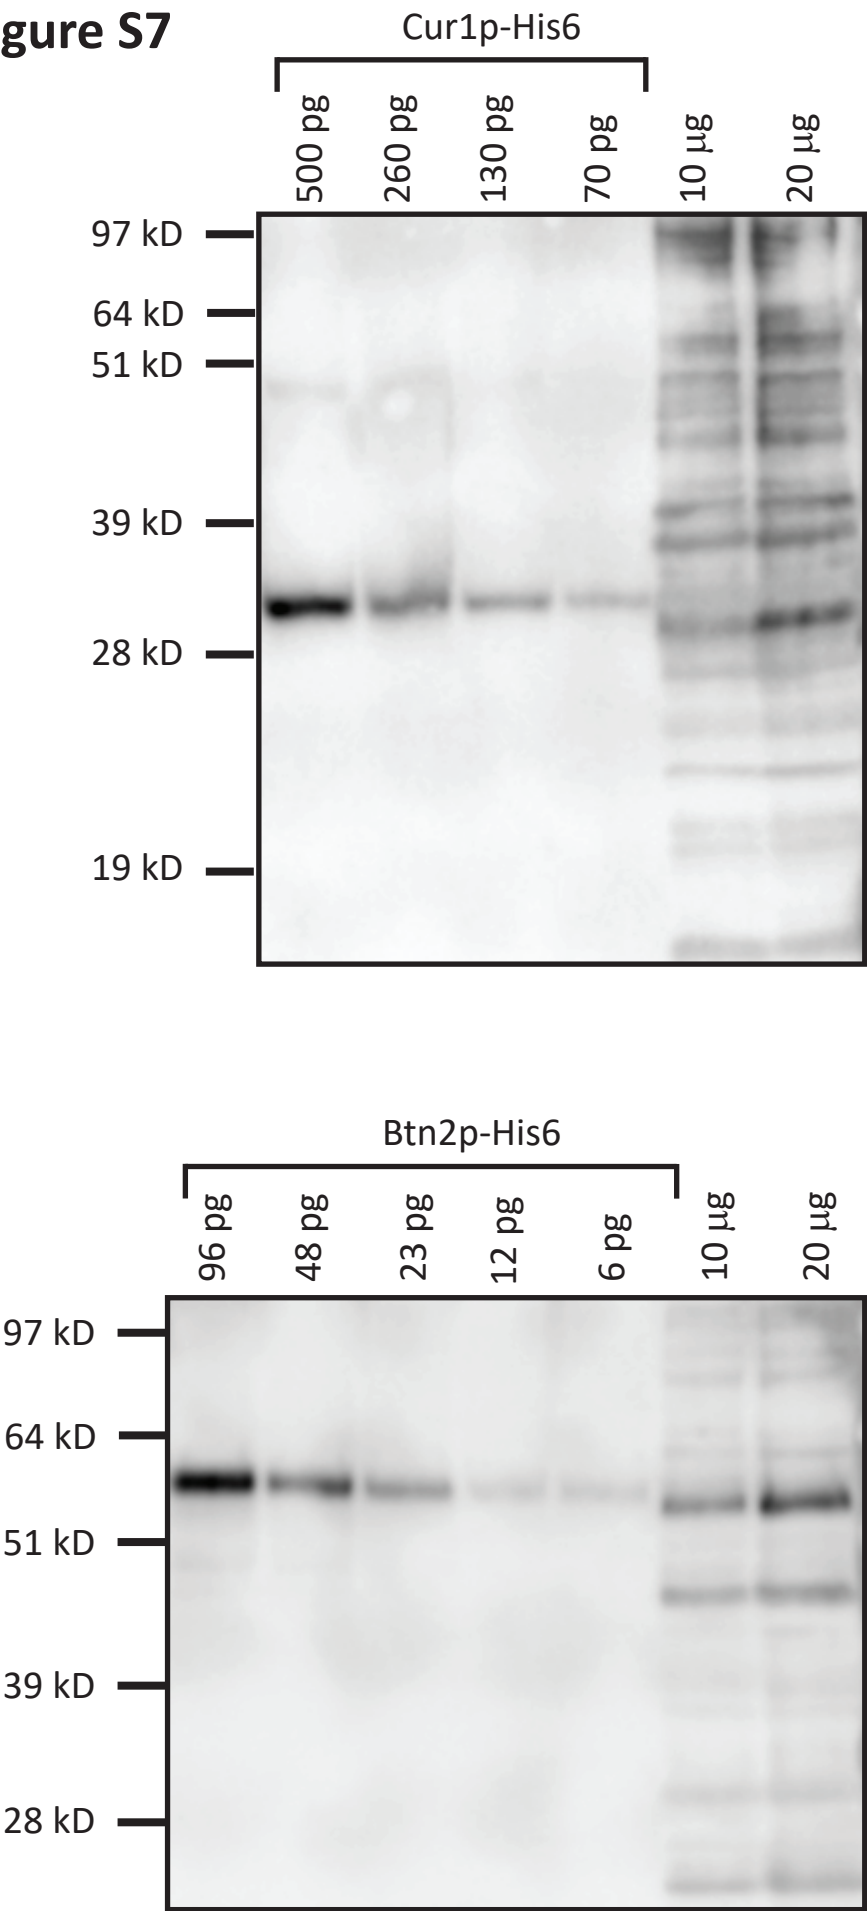

Supplement: Supplementary file 2 [file 26692376]

**WT**

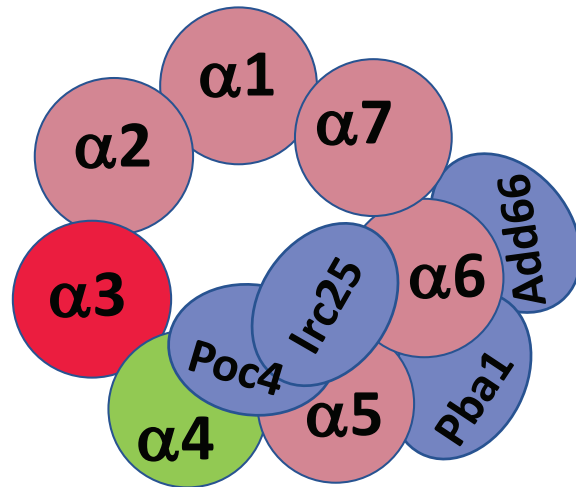

***irc25 $\Delta$ /poc4 $\Delta$***

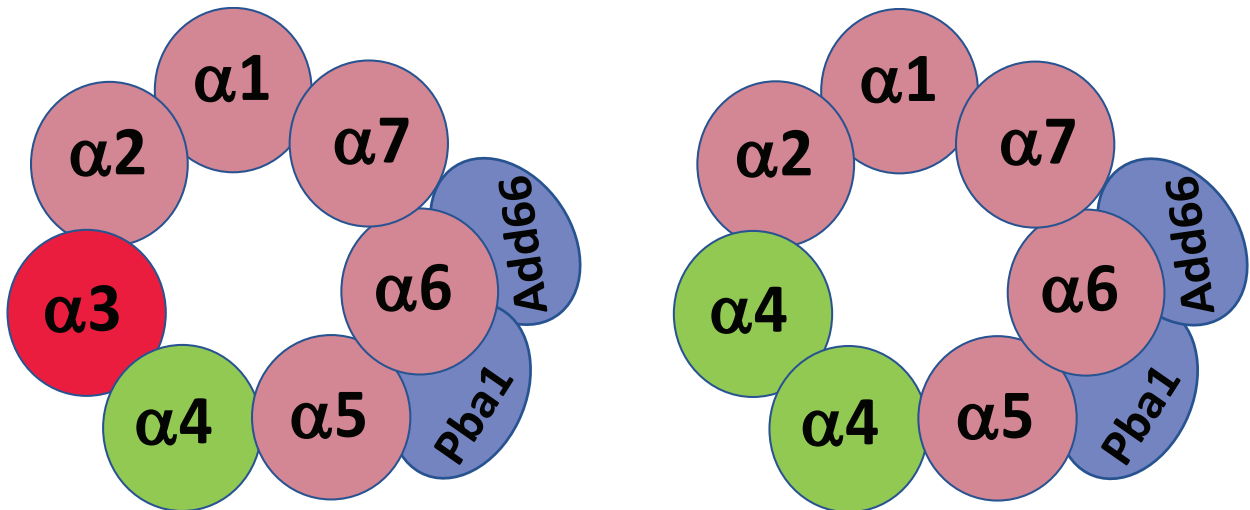

**$\alpha 3\Delta = pre9\Delta$**

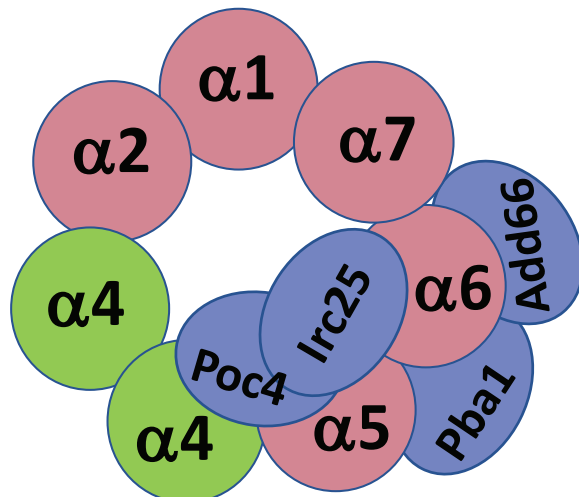

Supplement: Supplementary file 3 [file 26692376]

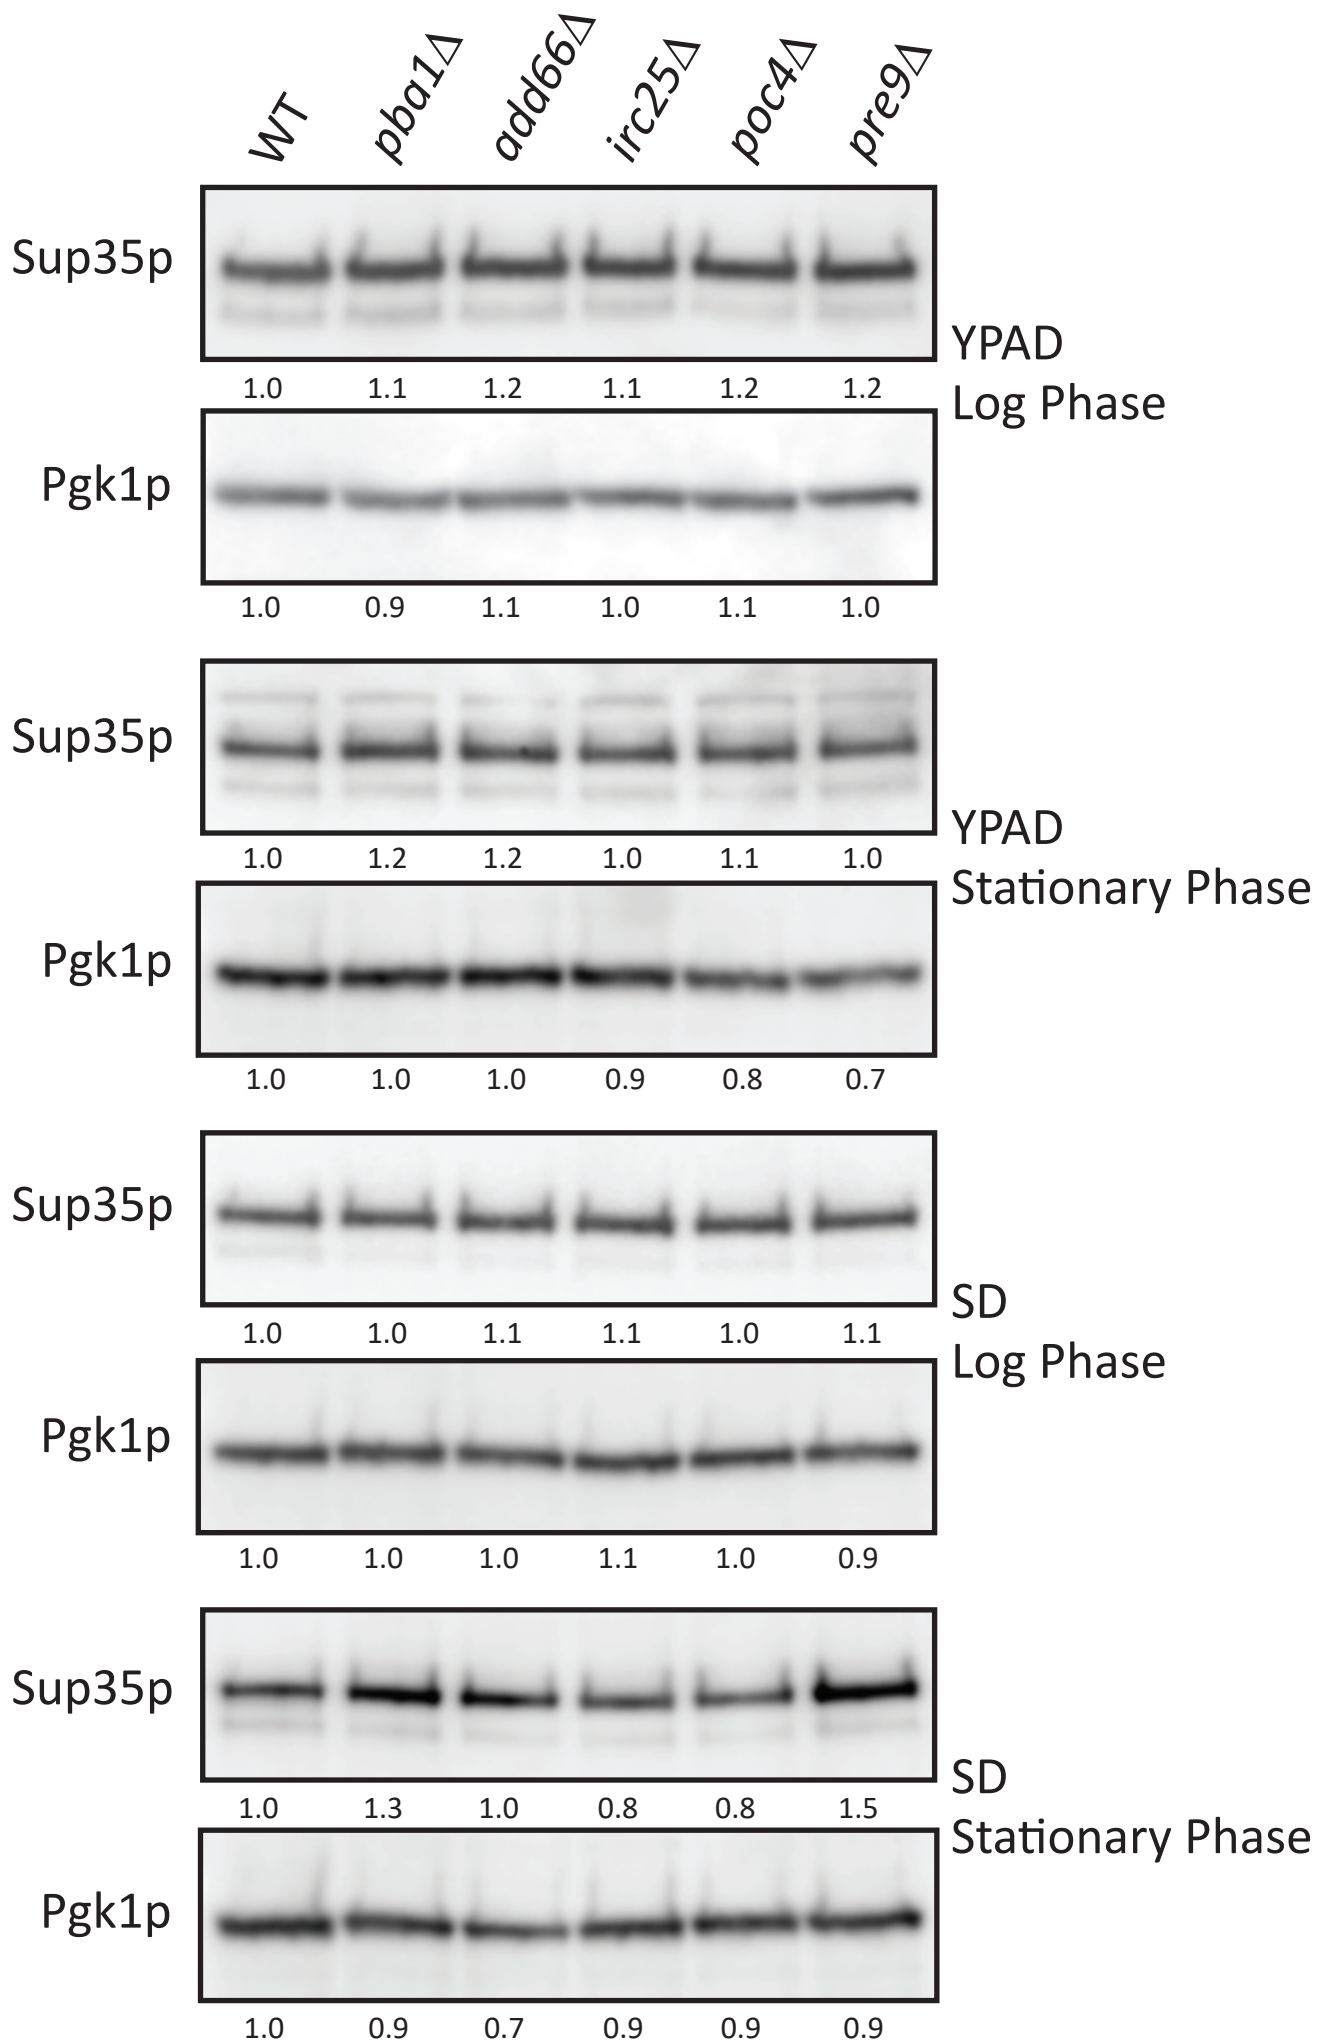

Supplement: Supplementary file 4 [file 26692376]

Figure S3.

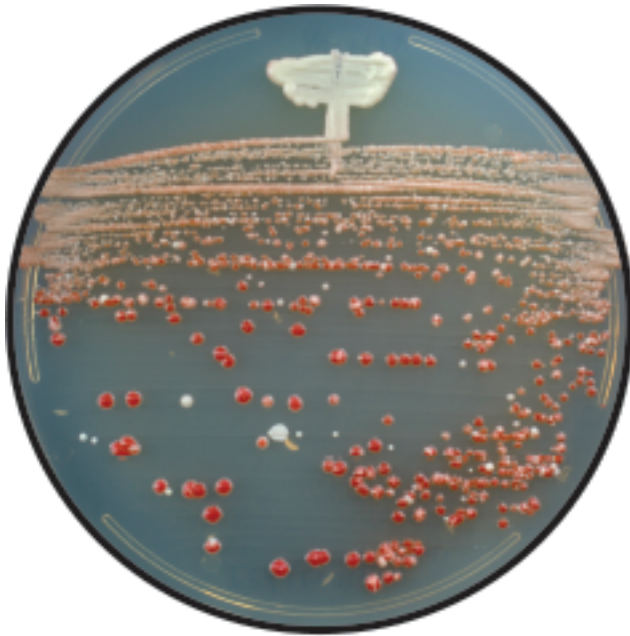

YES49 BY241 [URE3] *pre9*Δ

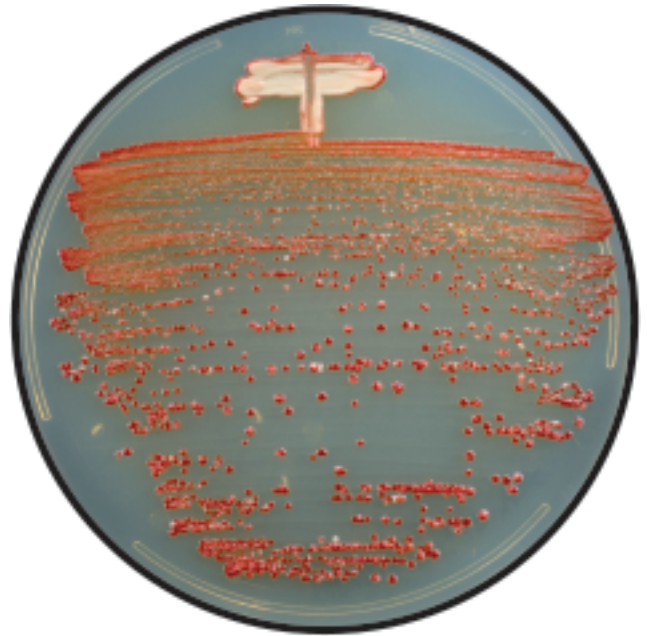

YMD131 DM075 (779-6A) [URE3] *pre9*Δ

Supplement: Supplementary file 5 [file 26692376]

Figure S2

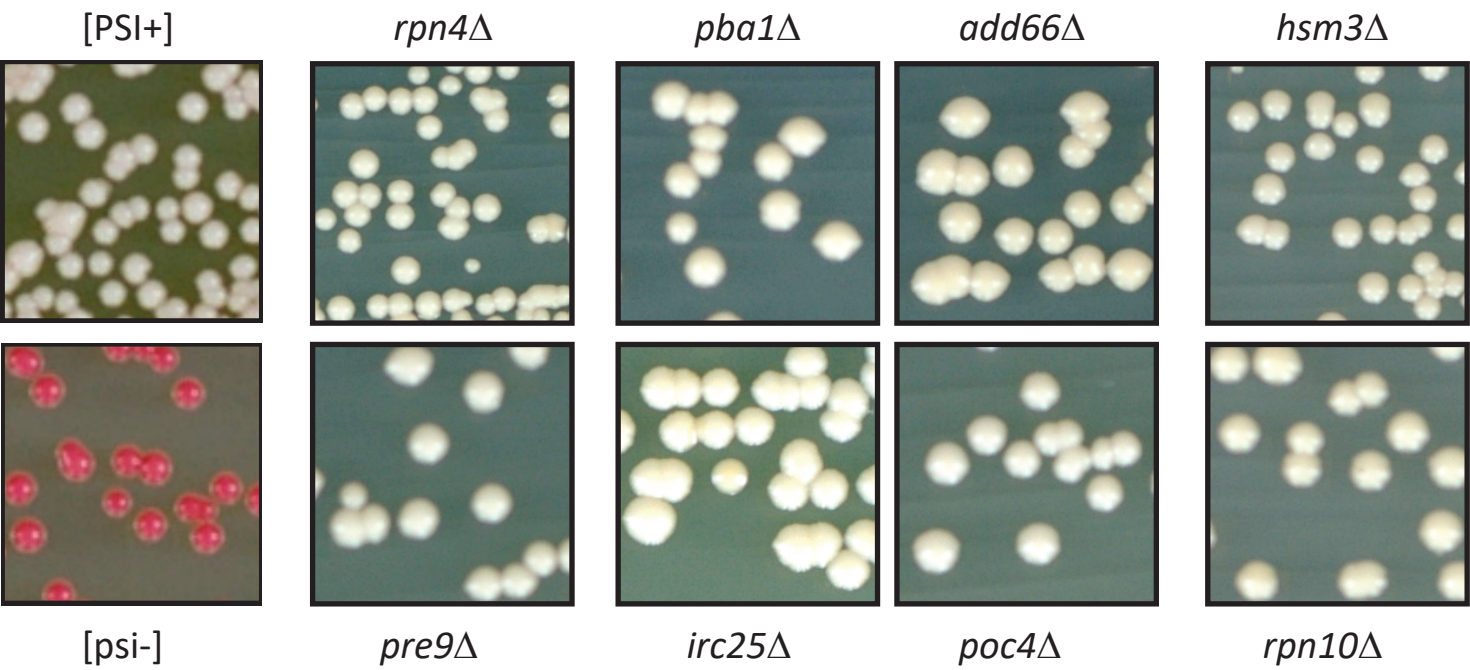

Supplement: Supplementary file 6 [file 26692376]

Figure S9

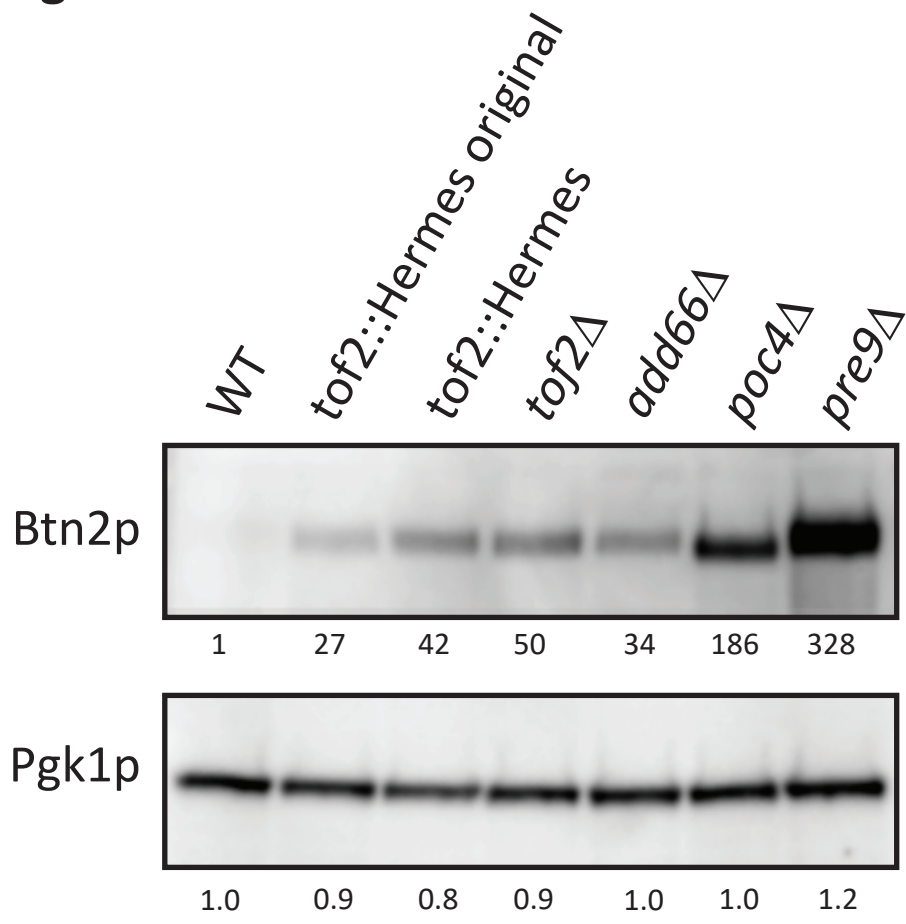

Supplement: Supplementary file 7 [file 26692376]

### Figure S5.

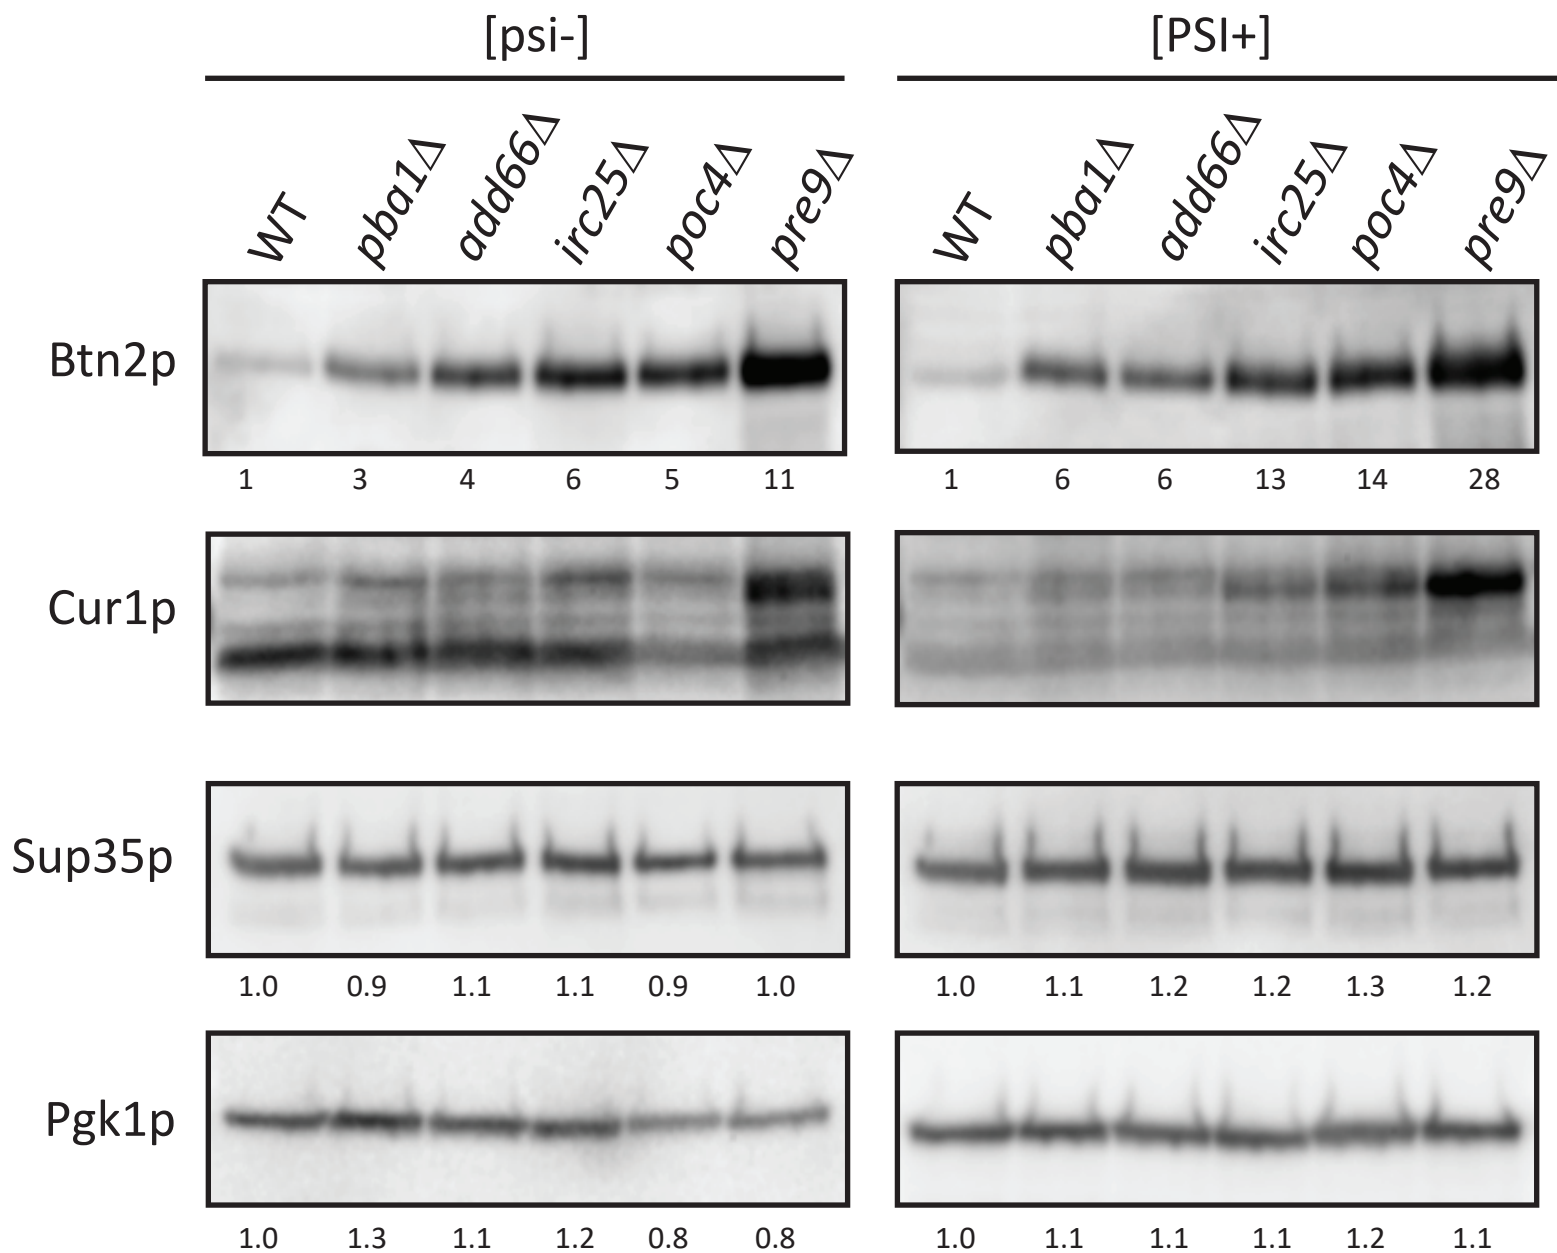

Supplement: Supplementary file 8 [file 26692376]

**Figure S10**

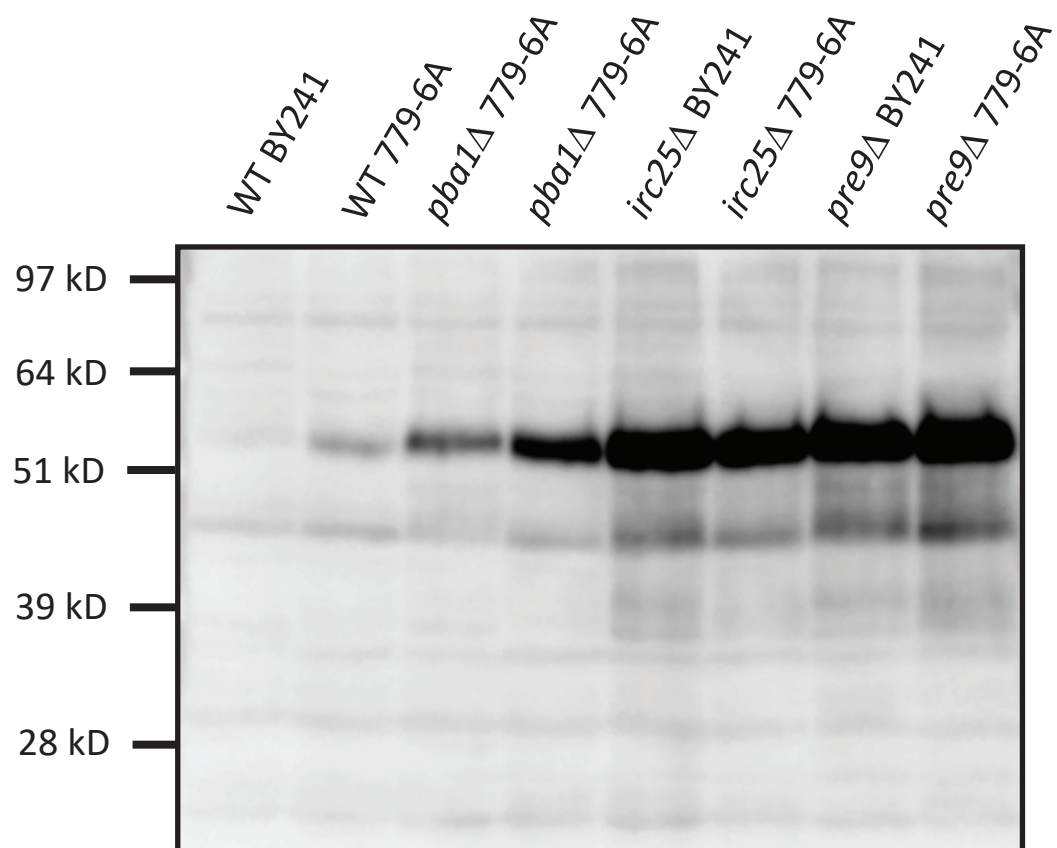

Supplement: Supplementary file 9 [file 26692376]

Figure S8

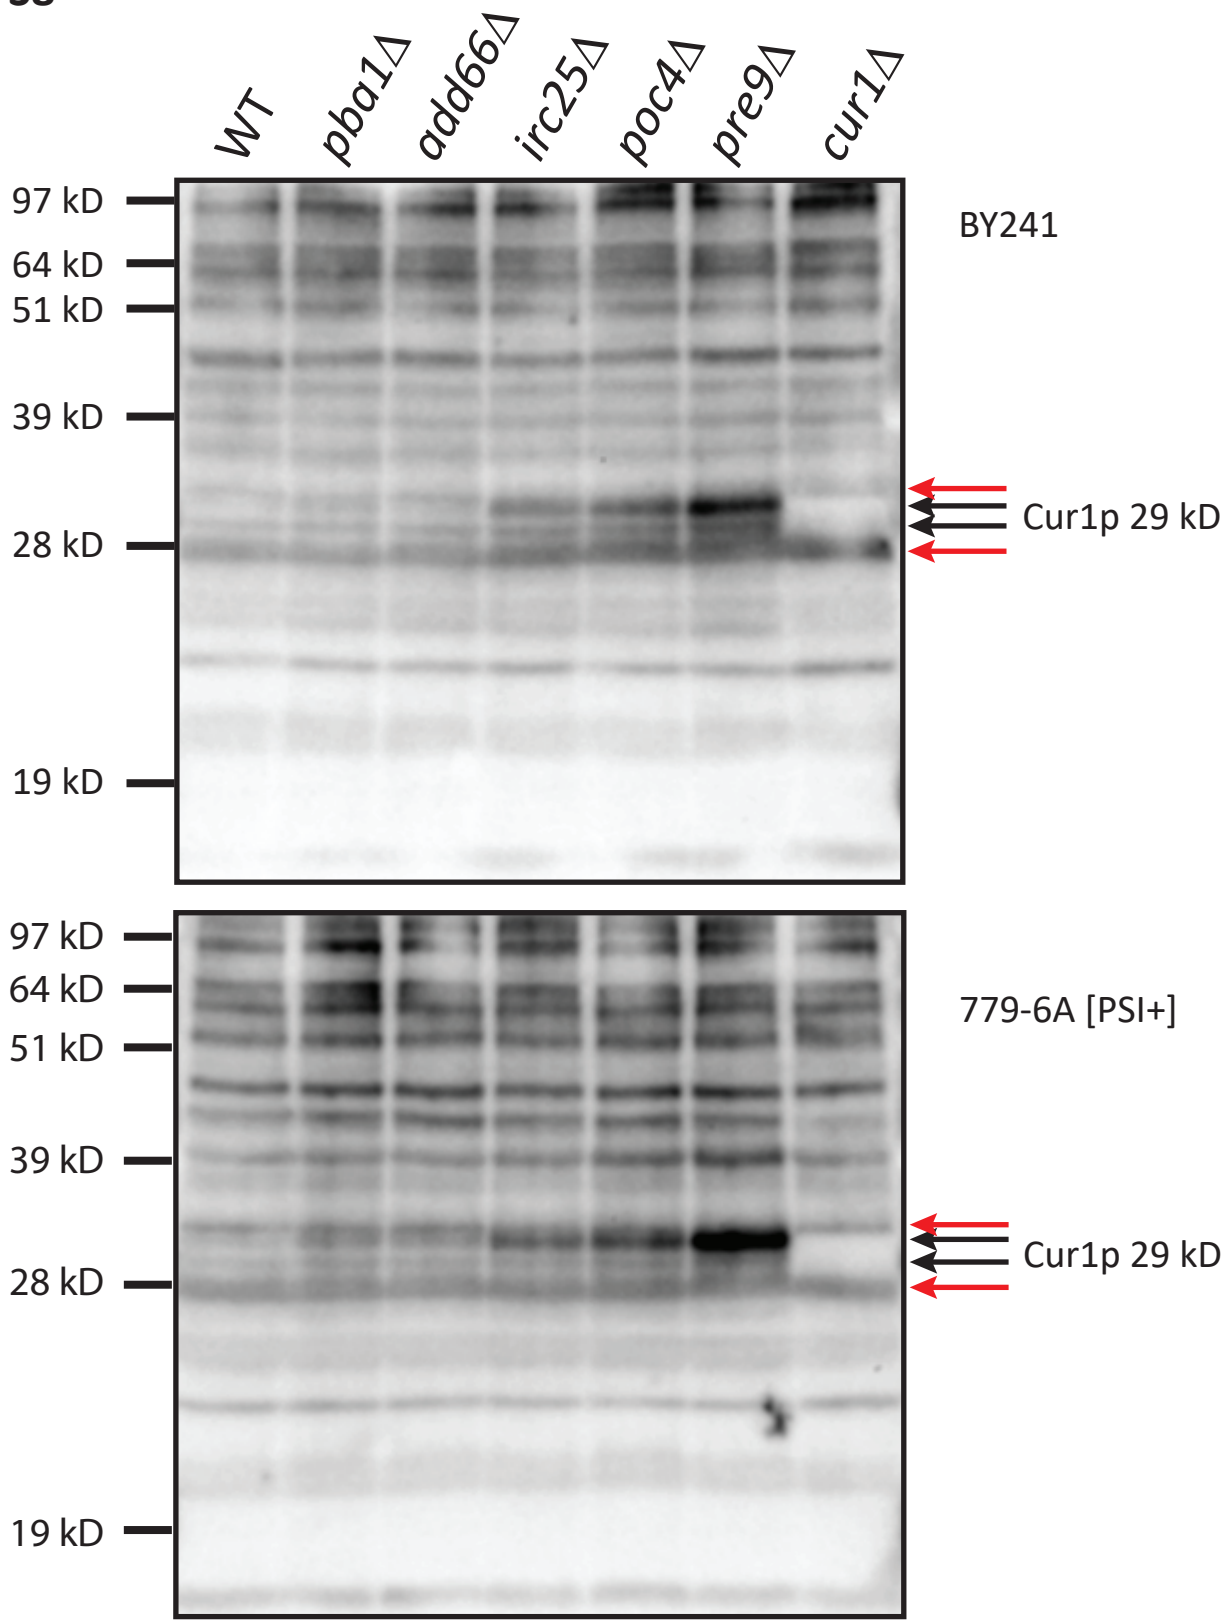

Supplement: Supplementary file 10 [file 26692376]
